# Supplementary material for: Expression Profile and Ligand Screening of a Putative Odorant-Binding Protein, AcerOBP6, from the Asian Honeybee
Source: MDPI journal article supplement (doi:10.3390/insects12110955), 2021-10-20
Supplement: s1 [file s1]

Table S1. Primers used in the experiment.

| Primers                    | Sequences (5'-3')                        |
|----------------------------|------------------------------------------|
| For qRT-PCR                |                                          |
| OBP6-F                     | TCTCCCTGCTGGTTGCGTT                      |
| OBP6-R                     | GTCATGGTATCCTCGATCGCT                    |
| Arp1-F                     | ACTACGGCCGAACGTGAAAT                     |
| Arp1-R                     | GGAAAAGAGCCTCGGGACAA                     |
| For recombinant expression |                                          |
| OBP6-F                     | cgcgatccAAAAAGATGAGCATCGAGG              |
| OBP6-R                     | cccaagcttTCATGGCATTAAATAGAGCTC           |
| For dsRNA synthesis        |                                          |
| OBP6-F1                    | ACGGTCAATTCAGAGGCGAA                     |
| OBP6-R1                    | CTCCGTAGCTGTCACTTCCT                     |
| T7-OBP6-F1                 | taatacgactcactatagggACGGTCAATTCAGAGGCGAA |
| T7-OBP6-R1                 | taatacgactcactatagggCTCCGTAGCTGTCACTTCCT |
| OBP6-F2                    | AGCATCGAGGAAGCGAAGAA                     |
| OBP6-R2                    | ACATTAGCCTCTCGTCCTGC                     |
| T7-OBP6-F2                 | taatacgactcactatagggAGCATCGAGGAAGCGAAGAA |
| T7-OBP6-R2                 | taatacgactcactatagggACATTAGCCTCTCGTCCTGC |
| GFP-F                      | CACAAGTTCAGCGTGTCC                       |
| GFP-R                      | CTGGGTGCTCAGGTAGTG                       |
| T7-GFP-F                   | taatacgactcactatagggCACAAGTTCAGCGTGTCC   |
| T7-GFP-R                   | taatacgactcactatagggCTGGGTGCTCAGGTAGTG   |

The wavy line represents the restriction site. The underline represents the T7 promote sequence.
