# Supplementary material for: Expression Profile and Ligand Screening of a Putative Odorant-Binding Protein, AcerOBP6, from the Asian Honeybee
Source: MDPI journal article supplement (doi:10.3390/insects12110955), 2021-10-20
Supplement: s1 [file s1]

**Table S2.** Competitive binding affinity of candidate ligands with AcerOBP6.

| Category          | Ligands                         | IC50 (μM) | Ki (μM) |
|-------------------|---------------------------------|-----------|---------|
| Queen pheromone   |                                 |           |         |
|                   | 9-ODA 9-Oxo-(E)-2-decenoic acid | 7.55      | 7.18    |
| Alarm pheromone   |                                 |           |         |
|                   | 2-Heptanone                     | 6.15      | 5.85    |
|                   | Isoamyl acetate                 | -         | -       |
| Nasonov pheromone |                                 |           |         |
|                   | Geraniol                        | 7.46      | 7.09    |
|                   | Nerol                           | -         | -       |
|                   | Farnesol                        | 5.56      | 5.29    |
| Brood pheromone   |                                 |           |         |
|                   | Methyl oleate                   | -         | -       |
|                   | Methyl stearate                 | -         | -       |
|                   | Methyl palmitate                | -         | -       |
|                   | Ethyl oleate                    | -         | -       |
|                   | Ethyl linoleate                 | -         | -       |
|                   | Methyl linoleate                | -         | -       |
|                   | Methyl linolenate               | -         | -       |
| Plant volatiles   |                                 |           |         |
|                   | 1- Nonanol                      | 5.56      | 5.29    |
|                   | 1-Octen-3-ol                    | 7.59      | 7.22    |
|                   | Myrcene                         | 5.42      | 5.16    |
|                   | β-Ionone                        | 5.45      | 5.18    |
|                   | β-Caryophyllene                 | -         | -       |
|                   | Linolenic acid                  | 1.76      | 1.67    |
|                   | Ethyl acetate                   | 5.56      | 5.28    |
|                   | Eucalyptol                      | 5.88      | 5.59    |
|                   | Eugenol                         | 4.90      | 4.66    |
|                   | Ethyl-trans-cinnamate           | 3.93      | 3.74    |
|                   | (+) -3-Carene                   | 3.17      | 3.02    |
|                   | β-Ocimene                       | 5.54      | 5.27    |
|                   | Nonanal                         | 8.91      | 8.48    |
|                   | α-Farnesene                     | -         | -       |
|                   | Ethyl cinnamate                 | -         | -       |
|                   | α-Ethyl linolenic               | -         | -       |
|                   | Linalool                        | 5.68      | 5.41    |
|                   | (+) -Cinene                     | 5.53      | 5.26    |
|                   | β-Pinene                        | 6.67      | 6.35    |
|                   | Methyl salicylate               | 10.07     | 9.58    |

IC50: the concentration of ligand compounds binding with 50% 1-NPN; Ki: dissociation constant. Short dash: it was not possible to calculate the IC50 value.
